# Supplementary material
Source: PubMed Central journal article supplement (PMC9321432)
Supplement: NIHMS1821964-supplement-supplement.pdf [file NIHMS1821964-supplement-supplement.pdf]

## Supplementary Appendix

Supplement to: Vogt MR, Wright PF, Hickey WF, De Buyscher T, Boyd KL, Crowe JE Jr. Enterovirus D68 in the anterior horn cells of a child with acute flaccid myelitis. *N Engl J Med* 2022;386:2059-60. DOI: 10.1056/NEJMc2118155

This appendix has been provided by the authors to give readers additional information about the work.

1 **TABLE OF CONTENTS**

2 Introduction ..... 2

3 Clinical Case ..... 3

4 Methods ..... 3

5 Results ..... 6

6 Discussion ..... 8

7 Figures ..... 11

8 Acknowledgements ..... 15

9 References ..... 16

10

## 11 INTRODUCTION

12 The term acute flaccid myelitis (AFM) was coined in 2014 after an outbreak across the  
13 United States that affected 120 patients in the late summer and fall months<sup>1</sup>. Retrospective  
14 analysis, however, suggests that cases of AFM have occurred in earlier years, including a  
15 California outbreak in 2012<sup>2</sup>. The paralysis of AFM affects mostly skeletal muscles of the  
16 extremities, but in severe cases can progress to bulbar paralysis, affecting the muscles of  
17 swallowing and breathing<sup>3</sup>. In children with AFM, as long as the onset of limb paralysis is  
18 recognized before progression to bulbar paralysis, supportive care such as positive pressure  
19 ventilation and direct gastric feeding typically prevents death. Recovery from AFM is highly  
20 variable but rarely involves full recovery of all strength<sup>4</sup>. While AFM is a highly morbid disease,  
21 mortality is low, with only two reported deaths out of 668 confirmed AFM cases since 2014 in  
22 the United States<sup>5</sup>.

23 The outbreaks of AFM disease seen in the U.S. in 2014, 2016, and 2018 all have  
24 coincided with the occurrence of enterovirus D68 (EV-D68) infections in at risk populations.  
25 Over time, evidence has grown to show a causal link between EV-D68 infection and AFM<sup>6</sup>. The  
26 supportive evidence of a causal link includes using murine models of infection in which EV-D68  
27 can infect motor neurons in the anterior horn of the spinal cord, with paralysis in the  
28 corresponding innervated limbs<sup>7,8</sup>. Also, immune cell infiltrates predominate surrounding  
29 infected motor neurons in mice<sup>8</sup>. *In vitro* experiments with differentiated human induced  
30 pluripotent stem cells (iPSCs) have shown that EV-D68 infects both neuron- and astrocyte-like  
31 cells in culture<sup>9,10</sup>.

32 Twelve years after his death, we returned to this patient's autopsy specimens now that we  
33 understand the significance of EV-D68 causing outbreaks of AFM to more deeply investigate the

34 pathology and immune response in this patient. We found that EV-D68 genomic RNA and  
35 capsid protein was present within the neurons but not the glial cells of the anterior horn of the  
36 spinal cord. Immune infiltrates of infected spinal cord were mainly composed of CD68+  
37 macrophages and CD8+ T cells. Spatial immune transcriptome analysis showed upregulation of  
38 antigen processing pathways for class I MHC presentation.

39

## 40 **CLINICAL CASE**

41         The patient in this study was a five-years-old male who was putatively in good health  
42 until developing symptoms of an upper respiratory tract infection coincident with a similar  
43 illness in many of his classmates in fall of 2008. Three days into this illness, he first experienced  
44 asymmetric weakness in his upper extremities and change was noted in the timbre of his voice.  
45 This presentation gradually progressed, and by day five of illness he had difficulty walking. That  
46 night he was found in bed to be apneic and on arrival to the hospital was unable to be  
47 resuscitated. His previously reported autopsy showed the presence of a T cell infiltrate in the  
48 spinal cord with neurons that stained positive for perforin and negative for caspase. Sequencing  
49 of RNA from his cerebrospinal fluid by the Centers for Disease Control and Prevention  
50 identified EV-D68 viral RNA<sup>11</sup>.

51

## 52 **METHODS**

53         We searched the medical literature for all available years in PubMed  
54 (<https://pubmed.ncbi.nlm.nih.gov>) on June 20, 2020 for reports of cases of patients who died  
55 during the acute illness of AFM. This patient was the only identified from whom we obtained  
56 specimens<sup>11</sup>, although at least two other deaths had been noted in Europe<sup>12</sup>. We used

57 formaldehyde fixed and paraffin embedded (FFPE) tissues from the 2008 autopsy in all studies  
58 described below.

59

## 60 IMMUNOHISTOCHEMISTRY

61 Slides were deparaffinized, then heat-induced antigen retrieval was performed using  
62 Leica Epitope Retrieval 2 solution for 20 min for all staining except NeuN, that used Epitope  
63 Retrieval 1 solution. Slides were incubated with antibody for 15 min to 1 hr. The Bond Polymer  
64 Refine detection system was used for visualization. Slides were dehydrated, cleared and  
65 coverslipped. All steps besides dehydration, clearing and coverslipping were performed on the  
66 Leica Bond Max IHC stainer. The antibodies used stained the following antigens: EV-D68 VP2  
67 capsid protein (GeneTex #132312), CD68 (StatLab #MM36-10), CD20 (StatLab #MM07-10),  
68 CD8 (StatLab #MM39-10), CD4 (Leica #PA0427), CD3 (StatLab #MM150-10), and NeuN  
69 (Millipore/Sigma #MAB377).

70

## 71 IN SITU HYBRIDIZATION

72 The EV-D68 VP1 gene sequence generated from the cerebrospinal fluid that was  
73 originally used to identify EV-D68 (GenBank accession #MT106051) was used as template to  
74 generate oligonucleotide target probes for *in situ* hybridization of spinal cord tissue (BaseScope  
75 kit; Advanced Cell Diagnostics, Inc.).

76 As a positive control for both the immunohistochemistry and the *in situ* hybridization, we  
77 used human origin cell lines (RD cells, ATCC #CCL-136) that were experimentally infected  
78 with EV-D68 *in vitro* and then fixed and paraffin embedded. For negative controls, we used  
79 uninfected RD cells, and from human specimens we included normal tonsil and placenta, and

80 from this specimen we used neurons in the unaffected regions in the same tissue section  
81 (contralateral region and posterior region of the spinal cord).

82

### 83 SPATIAL IMMUNOMICS

84 Sections of spinal cord tissue were tested for the location and quantification of human  
85 gene transcripts and gene products in tissue with a commercial spatial and molecular profiling  
86 technology that generates digital whole transcriptomes and profiling data for validated protein  
87 analytes from tissue (GeoMx<sup>®</sup> Digital Spatial Profiler platform; NanoString Technologies, Inc.).  
88 Slides were first stained with fluorescently-labeled antibodies against CD3E, CD68, and GFAP  
89 and with DAPI to mark nuclei. We then selected regions of interest in both inflamed tissue  
90 (marked by dense immune cell infiltrate in the anterior horn) or control tissue (contralateral  
91 anterior horn areas with few immune cells present and posterior spinal cord areas). The immuno-  
92 oncology probe library (NanoString; 1,793 genes plus 32 control genes, with an average of 5  
93 probes per gene) was hybridized to the spinal cord section. Ultraviolet light was then focused on  
94 the regions of interest to cleave linked DNA oligonucleotides with unique molecular identifying  
95 sequences to each probe. The cleaved oligonucleotides were then sequenced and quantified using  
96 next generation sequencing (Illumina). Reads were normalized either to the third quartile of  
97 reads in each region of interest (NanoString proprietary software) or by a fit of normal  
98 distributions using the *ashr* package<sup>13</sup> in R software (v. 3.6.3). We then compared the type and  
99 number of gene transcripts detected in inflamed versus control tissues. To determine which  
100 biological pathways were upregulated, gene transcripts with statistically significant upregulation  
101 in inflamed tissue were entered into the Gene Ontology (GO) knowledgebase  
102 (geneontology.org). We analyzed results from the GO biological process complete dataset. Both

103 raw transcript data and normalized data are available for download or interactive searching and  
104 visualization through a web-based interface (Shiny application, RStudio) at url  
105 [http://vogtviruslab.med.unc.edu/evd68\\_humanspinalcord/](http://vogtviruslab.med.unc.edu/evd68_humanspinalcord/).

106

## 107 STATISTICAL ANALYSIS

108 Principal component analysis (PCA) comparing immunomes of regions of interest was  
109 performed with variance stabilizing transformation using DESeq2 package in R. We generated  
110 volcano plots using the EnhancedVolcano package and used the ashR package in R to provide  
111 empirical Bayes shrinkage estimators for effect sizes. Gene ontology analysis used the Fisher's  
112 Exact test with correction by calculation of false discovery rate.

113

## 114 RESULTS

### 115 VIRUS DETECTION

116 We used an amplified *in situ* hybridization (ISH) technique to visualize EV-D68 genomic  
117 RNA in lung and spinal cord sections. EV-D68 RNA was almost absent from the lung at this  
118 time point; we found only very rare cells with the appearance of one or two genomes of EV-D68.  
119 If this patient had lung infection, this site of infection appeared to have largely resolved, which is  
120 consistent with the timing of clinical resolution of prodromal fever and/or respiratory symptoms  
121 near the onset of paralysis that is seen in most cases of AFM. In two different segments of spinal  
122 cord, we noted occasional EV-D68 RNA-containing neurons in one section and abundant RNA-  
123 containing neurons in another, cervical section (Figs. 1A, S1A), correlating with his upper limb  
124 weakness. RNA was present in both the cell bodies and the axons. RNA was not clearly found in  
125 any glial cells or other non-neuronal cell types. Immunohistochemistry (IHC) staining for the

126 neuron-specific marker NeuN revealed that cells with with EV-D68 RNA stained positive for  
127 NeuN in serial sections with only rare exception (Fig. S2). IHC staining for the EV-D68 VP2  
128 capsid protein in serial sections of spinal cord revealed viral protein was present in the same cells  
129 and cell structures in which viral RNA was detected (Figs. 1B, S1B).

130

### 131 IMMUNE STAINING

132 Using IHC, we characterized the inflammatory infiltrate present in the infected spinal  
133 cord segment. The most predominant immune cells detected were macrophages (Fig. S3A).  
134 Lymphocytes were also present, and these were chiefly T cells, with rare B cells detected (Fig.  
135 S3B), similar to what was previously reported<sup>11</sup>. Of those T cells present, nearly all were CD8+  
136 cytotoxic T cells and very few were CD4+ helper T cells (Fig. S3C).

137

### 138 SPATIAL IMMUNE TRANSCRIPTOMICS

139 Using an established panel of labeled probes that focused on 1,793 genes related to  
140 immunology and oncology, we compared the expression of these genes' transcripts in inflamed  
141 areas of the spinal cord versus control, non-inflamed areas. PCA confirmed that the transcripts  
142 from the visibly inflamed areas clustered together separately from the control areas (Fig. S4A).  
143 58 genes were significantly upregulated in the inflamed tissues (Fig. S4B). Notably, analysis of  
144 transcripts using NanoString software identified 51 significantly upregulated genes, with 33  
145 genes identified by both NanoString and the alternate R software-based analytic method. These  
146 upregulated genes are factors in many biological processes, but the most frequently identified  
147 upregulated biological pathways were involved in antigen processing for presentation on MHC-I  
148 molecules, consistent with the presence of a CD8 T cell infiltrate seen in IHC (Fig. S3C).



149

150 **DISCUSSION**

151 By identifying a unique case that occurred prior to widespread recognition of AFM and  
152 studying autopsy specimens, we better understand the pathogenesis of an emerging public health  
153 threat. While the main limitation of this study is its nature as a single case report capturing a  
154 single timepoint in disease, likely few autopsy studies will be possible in future due to increased  
155 awareness in the pediatric provider community and the effectiveness of modern supportive  
156 critical care when a case of AFM is now identified.

157 Regarding pathogenesis, this study reveals that EV-D68 directly infects spinal cord  
158 neurons and that a corresponding robust immune response is present. Either cytopathic effect  
159 from infection or tissue destruction of dysfunctional inflammation, or likely both factors, could  
160 contribute to death of motor neurons causing weakness. The composition of the inflammatory  
161 infiltrate, cytolytic CD8+ T cells and phagocytic CD68+ macrophages, plus prior staining  
162 showing perforin in the neurons<sup>11</sup> further lends plausibility to the role of immunopathogenesis  
163 contributing to AFM. Therefore, optimum acute treatment of AFM likely requires a multi-  
164 pronged approach focused on antiviral and anti-inflammatory strategies. Given the rarity of  
165 AFM, with 668 confirmed cases in the United States since 2014, designing a study with the  
166 power to determine efficacy of any therapeutic is challenging, making informed choices based on  
167 pathogenesis important. We observed evidence of viral replication in neurons days after onset of  
168 weakness, so direct antiviral therapies like monoclonal antibodies<sup>14</sup> or small molecule antiviral  
169 drugs might be of benefit at that point in infection. Further, anti-inflammatory medication may  
170 diminish immunopathogenesis, although balancing immune suppression with ongoing viral  
171 replication requires careful consideration. Intravenous immune globulin (IVIG) from all

172 manufacturers tested contained EV-D68 neutralizing antibodies<sup>15</sup>, and IVIG has anti-  
173 inflammatory action, so this treatment may be preferred until more specific antiviral and anti-  
174 inflammatory drugs are developed and evaluated.

175         This study also serves to compare natural EV-D68 infection to existing laboratory  
176 models. EV-D68 tropism at this acute timepoint in this patient was largely restricted to neurons,  
177 as nearly all infected cells also stained for NeuN. In some paralytic murine models of infection,  
178 EV-D68 also was largely restricted to neurons in the spinal cord<sup>7,8</sup>, lending validation to these  
179 features of those animal experiments as models of AFM. We highlighted the rare exception of a  
180 cell staining for EV-D68 RNA but not apparently staining for NeuN, which could represent an  
181 infected glial cell. Alternatively, this finding may represent a glial cell that phagocytosed  
182 infected cellular debris. While iPSC-derived neurons in culture can be infected by EV-D68<sup>9,10</sup>,  
183 iPSC-derived astrocytes also were infected by EV-D68<sup>10</sup>, which is incongruent with all but this  
184 rare observation. Due to technical limitations, we could not co-stain with GFAP or any other  
185 marker of astrocytes. Also, this study represents a single case and a single time point in infection.  
186 Therefore, this study does not exclude the possibility that EV-D68 could infect astrocytes or  
187 other non-neuronal cell types.

188         We present the transcriptomic data gathered here primarily for hypothesis generation for  
189 further studies, as many limitations are inherent to this analysis. We were unable to study the  
190 whole transcriptome. Including control regions of interest from posterior spinal cord may not be  
191 the best comparison, but we were unable to use completely uninflamed sections of anterior spinal  
192 cord to select control regions of interest. Nonetheless, the data could prove valuable for study  
193 given the rarity of this sample. For example, some investigators are profiling the transcriptomes  
194 of cells in the cerebrospinal fluid of patients with AFM, so this data set from spinal cord tissue

195 serves for relevant comparison. The ontology of the upregulated pathways is consistent with the  
196 immune infiltrates seen, as we would expect both infected cells and macrophages to upregulate  
197 MHC class I presentation and CD8+ T cells to respond to this stimulation.

198         Aside from its nature as a study of a single individual, other caveats are worth noting  
199 regarding this case. The detection of any virus in cerebrospinal fluid of AFM patients is rare<sup>6</sup>, yet  
200 this patient had EV-D68 detected in cerebrospinal fluid by RT-PCR<sup>11</sup>. This isolate from 2008  
201 groups into clade C, yet most isolates detected since 2014 come from clades B and D<sup>16</sup>, and it is  
202 possible B and D clade isolate pathogenesis could differ from that of clade C viruses in humans.  
203 However, the murine models that exhibit similar tropism as seen in this human infection use  
204 clade B viruses<sup>7,8</sup>, so clade B viruses are capable of tropism in other mammals similar to what we  
205 observed with clade C virus.

206         Overall, these studies provide further evidence that EV-D68 infection of the spinal cord is  
207 a direct cause of AFM, now with insight into the pathogenesis of this process in humans, which  
208 may be due to a combination of direct effects of viral infection and resultant inflammation. This  
209 model is consistent with the presence of signal change in the anterior horn of the spinal cord in  
210 images obtained with magnetic resonance imaging of humans with AFM<sup>17-19</sup>, and with many  
211 laboratory models of EV-D68-associated AFM<sup>7-9</sup>. Information derived from this case report may  
212 inform treatment approaches and further direction of laboratory studies. The study also validates  
213 the high value of conducting autopsies and biobanking tissues for cases of poorly explained  
214 infectious syndromes.

215

216 **FIGURES**

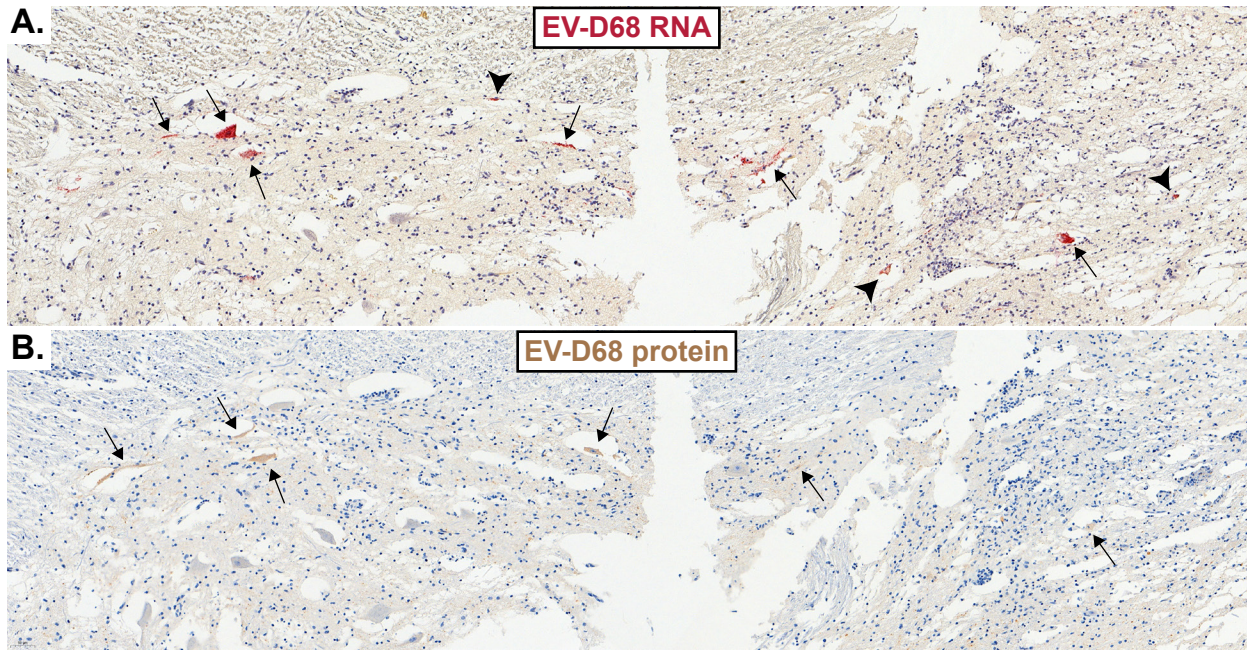

217

218 **Figure S1. EV-D68 RNA and capsid protein are present in spinal cord anterior horn**  
219 **neurons.**

220 *In situ* hybridization (A) or immunohistochemistry (B) demonstrate EV-D68-specific genomic  
221 RNA or viral capsid protein, respectively. In these serial sections of spinal cord, examples of  
222 neuronal structures staining for both RNA and protein are highlighted by arrows, whereas  
223 neuronal structures staining for RNA without a clear corresponding protein staining structure are  
224 highlighted by arrowheads. Neurons shown in Fig. 1 are also seen in these lower magnification  
225 images of the same sections.

226

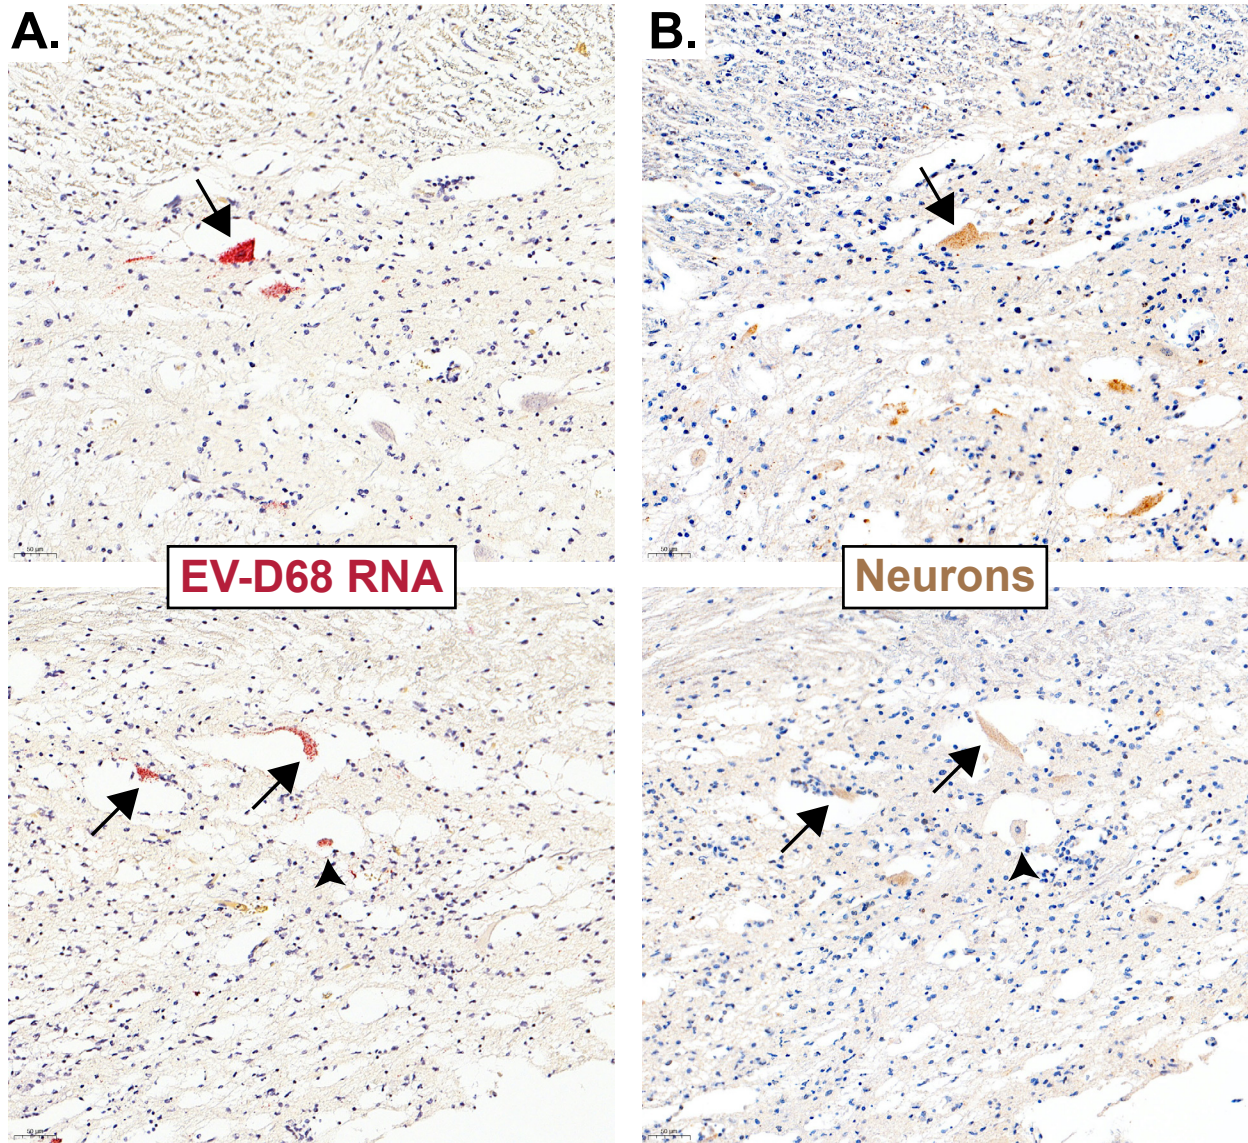

227

228 **Figure S2. Most cells staining for EV-D68 RNA stain for neuron-specific marker NeuN.**

229 *In situ* hybridization (A) or immunohistochemistry (B) demonstrate EV-D68-specific genomic

230 RNA or NeuN, respectively. NeuN is a specific marker of neurons. In these side-by-side serial

231 sections of spinal cord, examples of neuronal structures staining for both EV-D68 RNA and

232 NeuN are highlighted by arrows. A rare example of a cell staining for RNA but not for NeuN is

233 highlighted by an arrowhead in the lower panels.

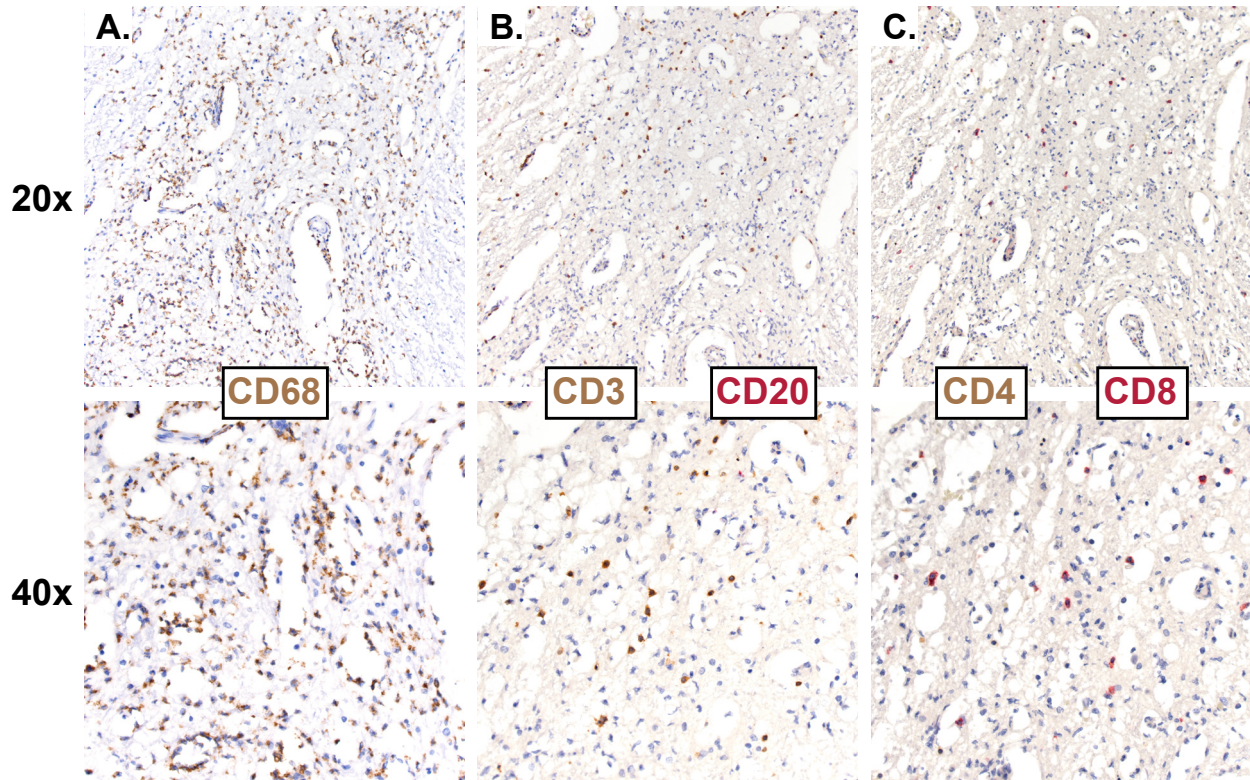

234

235 **Figure S3. Macrophages and CD8+ T cells predominate in the inflammatory infiltrate of**  
 236 **the EV-D68-infected spinal cord.**

237 (A) Staining for CD68 reveals an infiltrate of predominantly macrophages. (B) Two-color IHC  
 238 with co-staining for CD20 (red) and CD3 (brown) show few B cells but numerous T cells. (C)  
 239 Co-staining for CD4 (brown) and CD8 (red) show that the T cells are predominantly cytotoxic T  
 240 cells.

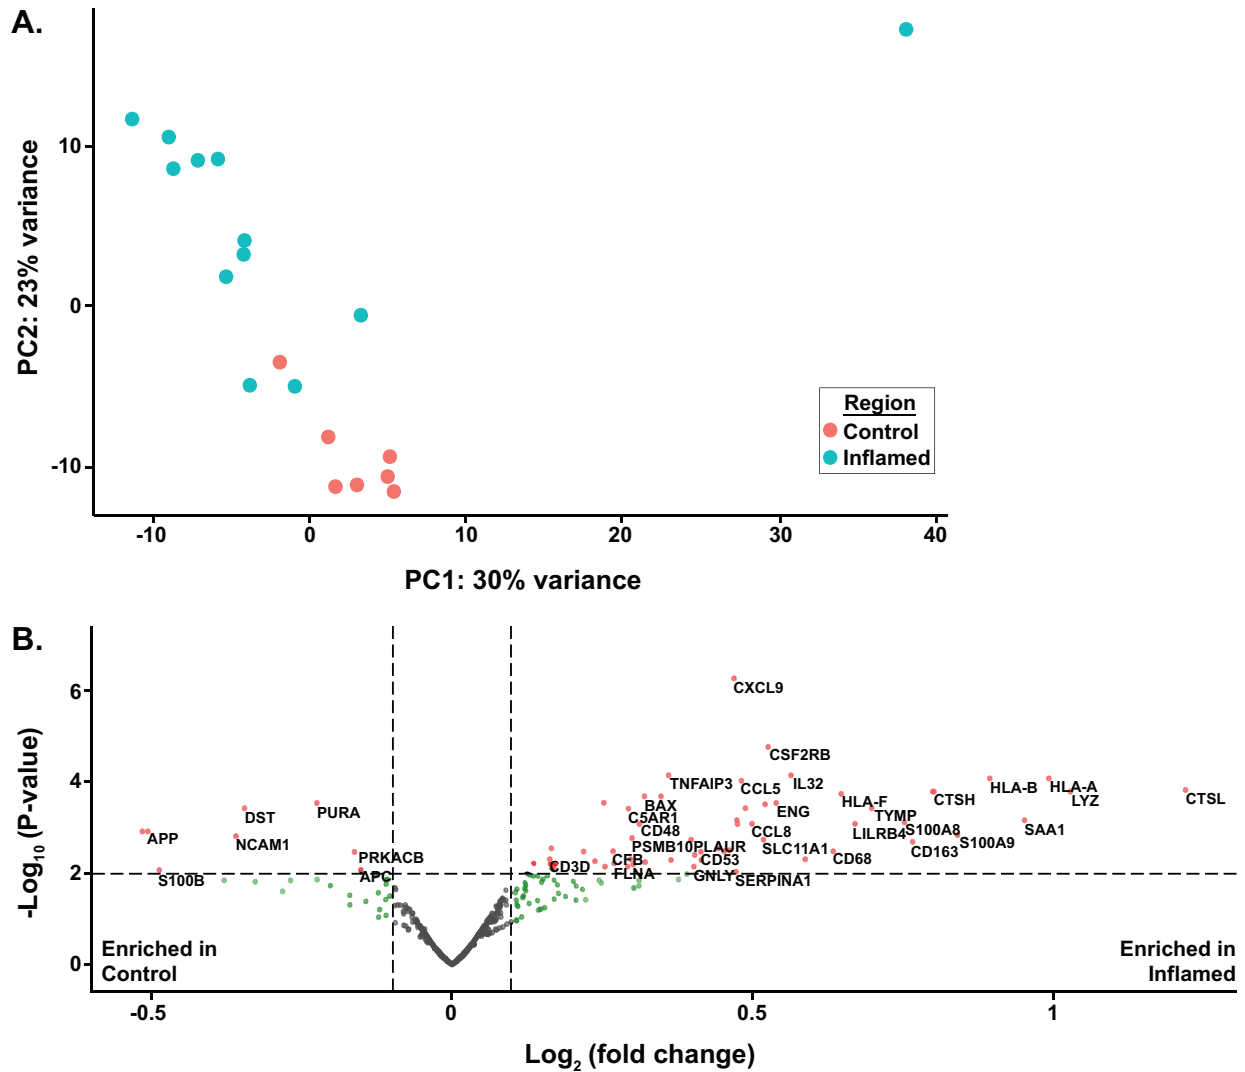

241

242 **Figure S4. Immune-related transcripts related to antigen presentation on MHC are**  
 243 **upregulated in EV-D68-infected spinal cord.**

244 (A) Principal component analysis of immune transcriptomes of twelve inflamed and seven

245 control regions of interest in the patient's spinal cord. (B) Volcano plot with each dot

246 representing an individual gene transcript. Transcripts upregulated in inflamed areas lie to the

247 right and those with lower P values lie higher on the graph.

248

249 **ACKNOWLEDGMENTS**

250 We acknowledge assistance from the Vanderbilt Translational Pathology Shared Resource  
251 supported by NCI/NIH Cancer Center Support Grant 5P30 CA68485-19 and the Shared  
252 Instrumentation Grant S10 OD023475-01A1 for the Leica Bond RX. We acknowledge assistance  
253 from the Bioinformatics and Analytics Research Collaborative, which is supported by University  
254 of North Carolina at Chapel Hill School of Medicine strategic funds. W.A. Nix and M.S. Oberste  
255 at the Centers for Disease Control and Prevention identified the patient's EV-D68 sequence and  
256 clade designation. Dr. Vogt was supported by grant K08 AI153125 from the National Institute of  
257 Allergy and Infectious Diseases and the Pediatric Infectious Diseases Society-St. Jude Children's  
258 Hospital Fellowship Program in Basic Research. The Fellowship was funded by St. Jude  
259 Children's Research Hospital and jointly sponsored by the Pediatric Infectious Diseases Society  
260 and St. Jude Children's Research Hospital. Dr. Crowe was supported by grant U19 AI117905  
261 from the National Institute of Allergy and Infectious Diseases.

262



263 **REFERENCES**

264

- 265 1. Sejvar JJ, Lopez AS, Cortese MM, et al. Acute flaccid myelitis in the United States,  
266 August-December 2014: results of nationwide surveillance. *Clin Infect Dis* 2016;63:737-45.
- 267 2. Van Haren K, Ayscue P, Waubant E, et al. Acute flaccid myelitis of unknown etiology in  
268 California, 2012-2015. *JAMA* 2015;314:2663-71.
- 269 3. Messacar K, Schreiner TL, Maloney JA, et al. A cluster of acute flaccid paralysis and  
270 cranial nerve dysfunction temporally associated with an outbreak of enterovirus D68 in children  
271 in Colorado, USA. *Lancet* 2015;385:1662-71.
- 272 4. Murphy OC, Messacar K, Benson L, et al. Acute flaccid myelitis: cause, diagnosis, and  
273 management. *Lancet* 2021;397:334-46.
- 274 5. Centers for Disease Control and Prevention. Acute Flaccid Myelitis Frequently Asked  
275 Questions. (Accessed September 23, 2021, at [https://www.cdc.gov/acute-flaccid-](https://www.cdc.gov/acute-flaccid-myelitis/faqs.html)  
276 [myelitis/faqs.html](https://www.cdc.gov/acute-flaccid-myelitis/faqs.html).)
- 277 6. Messacar K, Asturias EJ, Hixon AM, et al. Enterovirus D68 and acute flaccid myelitis-  
278 evaluating the evidence for causality. *Lancet Infect Dis* 2018;18:e239-e47.
- 279 7. Hixon AM, Yu G, Leser JS, et al. A mouse model of paralytic myelitis caused by  
280 enterovirus D68. *PLoS Pathog* 2017;13:e1006199.
- 281 8. Morrey JD, Wang H, Hurst BL, et al. Causation of acute flaccid paralysis by myelitis and  
282 myositis in enterovirus-D68 infected mice deficient in interferon alpha/beta/gamma receptor  
283 deficient mice. *Viruses* 2018;10.

- 284 9. Hixon AM, Clarke P, Tyler KL. Contemporary circulating enterovirus D68 strains infect  
285 and undergo retrograde axonal transport in spinal motor neurons independent of sialic acid. *J*  
286 *Virol* 2019;93.
- 287 10. Rosenfeld AB, Warren AL, Racaniello VR. Neurotropism of enterovirus D68 isolates is  
288 independent of sialic acid and is not a recently acquired phenotype. *mBio* 2019;10.
- 289 11. Kreuter JD, Barnes A, McCarthy JE, et al. A fatal central nervous system enterovirus 68  
290 infection. *Arch Pathol Lab Med* 2011;135:793-6.
- 291 12. Knoester M, Helfferich J, Poelman R, et al. Twenty-nine Cases of Enterovirus-D68-  
292 associated Acute Flaccid Myelitis in Europe 2016: A Case Series and Epidemiologic Overview.  
293 *Pediatr Infect Dis J* 2019;38:16-21.
- 294 13. Stephens M. False discovery rates: a new deal. *Biostatistics* 2017;18:275-94.
- 295 14. Vogt MR, Fu J, Kose N, et al. Human antibodies neutralize enterovirus D68 and protect  
296 against infection and paralytic disease. *Sci Immunol* 2020;5.
- 297 15. Zhang Y, Moore DD, Nix WA, Oberste MS, Weldon WC. Neutralization of Enterovirus  
298 D68 isolated from the 2014 US outbreak by commercial intravenous immune globulin products.  
299 *J Clin Virol* 2015;69:172-5.
- 300 16. Midgley SE, Benschop K, Dyrdak R, et al. Co-circulation of multiple enterovirus D68  
301 subclades, including a novel B3 cluster, across Europe in a season of expected low prevalence,  
302 2019/20. *Euro Surveill* 2020;25.
- 303 17. Maloney JA, Mirsky DM, Messacar K, Dominguez SR, Schreiner T, Stence NV. MRI  
304 findings in children with acute flaccid paralysis and cranial nerve dysfunction occurring during  
305 the 2014 enterovirus D68 outbreak. *AJNR Am J Neuroradiol* 2015;36:245-50.

- 306 18. Gordon-Lipkin E, Munoz LS, Klein JL, Dean J, Izbudak I, Pardo CA. Comparative  
307 quantitative clinical, neuroimaging, and functional profiles in children with acute flaccid myelitis  
308 at acute and convalescent stages of disease. *Dev Med Child Neurol* 2019;61:366-75.
- 309 19. Okumura A, Mori H, Fee Chong P, et al. Serial MRI findings of acute flaccid myelitis  
310 during an outbreak of enterovirus D68 infection in Japan. *Brain Dev* 2019;41:443-51.
- 311
